# Supplementary material for: ICEAGE (Incidence of Complications following Emergency Abdominal surgery: Get Exercising): study protocol of a pragmatic, multicentre, randomised controlled trial testing physiotherapy for the prevention of complications and improved physical recovery after emergency abdominal surgery
Source: PubMed Central journal article supplement (PMC6029354; doi:10.1186/s13017-018-0189-y), 2018-07-03
Supplement: 13017_2018_189_MOESM4_ESM.pdf [file 13017_2018_189_MOESM4_ESM.pdf]

## HOW TO CALCULATE VO<sub>2</sub> USING SELF ADMINISTERED ACTIVITY QUESTIONNAIRE (SAQ) SCORE:

**Step 1:** Instruct patient to complete SAQ

**Step 2:** Determine the individual, highest MET value for that patient to calculate their SAQ according to the following table: *e.g. if the patients highest scoring question was question e. then their SAQ=7.00*

| <i>Can you complete the following without symptoms?</i>                                                             | <i>MET value</i> |
|---------------------------------------------------------------------------------------------------------------------|------------------|
| m. Dress without stopping because of symptoms?                                                                      | 2.00             |
| j. Do moderate work around the house like vacuum, sweep floors, or carry groceries?                                 | 2.50             |
| a. Walk down a flight of stairs unassisted and without stopping?                                                    | 3.00             |
| k. Do heavy work around the house like strip and make the bed, hang out washing, or wash the car?                   | 3.25             |
| c. Do moderate gardening like weed or rake the leaves?                                                              | 4.25             |
| l. Push an electric or petrol mower on level ground?                                                                | 4.50             |
| h. Participate in moderate activities like walk at a normal pace (4km/hr) or play golf and carry the clubs?         | 4.75             |
| d. Walk briskly around an oval?                                                                                     | 5.00             |
| g. Do outdoor work like split wood or dig in the garden?                                                            | 5.50             |
| b. Carry an 8kg weight (e.g. a load of wet washing) up 8 steps?                                                     | 6.00             |
| e. Carry at least 10kg (e.g. a suitcase) up 8 steps?                                                                | 7.00             |
| f. Carry objects that weigh at least 35kg (e.g. an 11 year old child)?                                              | 7.50             |
| i. Participate in vigorous activities like swimming (crawl), jogging (8km/hr), cycling (17km/hr) or singles tennis? | 9.00             |
| <b><i>MET = metabolic equivalent</i></b>                                                                            |                  |

**Step 3:** Record the patient's age in years, height in centimetres and weight in kilograms.

**Step 4:** To calculate VO<sub>2</sub>; substitute these values into the following equation:

$$\text{VO}_2 = 2.36(\text{SAQ}) + 0.35(\text{HEIGHT cm}) - 0.19(\text{AGE yrs}) - 0.16(\text{WEIGHT kg}) - 33.89$$

## SELF-ADMINISTERED PHYSICAL ACTIVITY QUESTIONNAIRE (SAQ)

**Can you complete the following activities at a normal rate?  
Circle YES or NO**

|                                                                                                                     | *      |
|---------------------------------------------------------------------------------------------------------------------|--------|
| a. Walk down a flight of stairs unassisted and without stopping?                                                    | YES NO |
| b. Carry an 8kg weight (e.g. a load of wet washing) up 8 steps?                                                     | YES NO |
| c. Do moderate gardening like weed or rake the leaves?                                                              | YES NO |
| d. Walk briskly around an oval?                                                                                     | YES NO |
| e. Carry at least 10kg (e.g. a suitcase) up 8 steps?                                                                | YES NO |
| f. Carry objects that weigh at least 35kg (e.g. an 11 year old child)?                                              | YES NO |
| g. Do outdoor work like split wood or dig in the garden?                                                            | YES NO |
| h. Participate in moderate activities like walk at a normal pace (4km/hr) or play golf and carry the clubs?         | YES NO |
| i. Participate in vigorous activities like swimming (crawl), jogging (8km/hr), cycling (17km/hr) or singles tennis? | YES NO |
| j. Do moderate work around the house like vacuum, sweep floors, or carry groceries?                                 | YES NO |
| k. Do heavy work around the house like strip and make the bed, hang out washing, or wash the car?                   | YES NO |
| l. Push an electric or petrol mower on level ground?                                                                | YES NO |
| m. Dress without stopping because of symptoms?                                                                      | YES NO |

**\* If you answered "NO" to any of the above questions, what stops you doing these activities? (e.g. shortness of breath, angina, recent surgery etc.)**

---



---



---
